# Supplementary material
Source: publisher site journal article supplement (https://www.dovepress.com/article/312902)
Supplement: Supplementary file 1 [file get_supplementary_file.php]

**Supplementary Table 1 Characteristics of patients who failed to achieve SVR12**

| **No.** | **Sex** | **Age** | **HCV-**  **RNA** | **Genotype** | **Treatment**  **regimen** | **Cirrhosis** | **Treatment experienceda** | **HBV**  **coinfection** | **ALT** | **AST** | **PLT** | **APRI** | **FIB-4** |
| --- | --- | --- | --- | --- | --- | --- | --- | --- | --- | --- | --- | --- | --- |
| **1** | **female** | **32** | **6.20** | **3b** | **SOF+RBV** | **no** | **no** | **no** | **77** | **50** | **201** | **0.71** | **0.91** |
| **2** | **male** | **40** | **5.85** | **3b** | **SOF+RBV** | **yes** | **no** | **no** | **253** | **135** | **175** | **1.93** | **1.94** |
| **3** | **male** | **46** | **UK** | **3b** | **SOF/VEL+RBV** | **no** | **no** | **no** | **UK** | **UK** | **UK** | **UK** | **UK** |
| **4** | **male** | **52** | **5.23** | **3k** | **SOF/VEL** | **yes** | **no** | **no** | **113** | **112** | **87** | **3.22** | **6.3** |
| **5** | **male** | **42** | **6.69** | **6a** | **SOF/VEL** | **no** | **no** | **no** | **29** | **49** | **201** | **0.61** | **1.9** |

**Abbreviations:** ALT, alanine aminotransaminase; APRI, aspartate aminotransferase to platelet ratio index; AST, aspartate aminotransferase; FIB-4, fibrosis-4; HBV, hepatitis B virus; HCV, hepatitis C virus; PLT, platelet; RBV, ribavirin; RNA, ribonucleic acid; SOF, sofosbuvir; UK, unknown; VEL, velpatasvir.

a: Treated with DAAs or interferon and ribavirin regimens.

**Supplementary Table 2 Fibrosis improvement evaluated by APRI and FIB-4 in patients with different characteristics**

|  |  | **FIB-4**  **Before treatment After treatment** | | **P value** | **APRI**  **Before treatment After treatment** | | **P value** |
| --- | --- | --- | --- | --- | --- | --- | --- |
| **Sex** | **male** | **4.25±4.57** | **2.36±2.51** | **<0.0001** | **2.77±3.20** | **0.66±0.80** | **<0.0001** |
|  | **female** | **2.17±1.77** | **1.66±1.40** | **0.027** | **1.21±1.06** | **0.41±0.36** | **<0.0001** |
| **Age** | **<40y** | **1.86±1.83** | **1.12±0.71** | **0.015** | **1.47±1.47** | **0.35±0.24** | **0.001** |
|  | **≥40y** | **4.73±4.61** | **2.82±2.62** | **<0.0001** | **2.79±3.30** | **0.73±0.84** | **<0.0001** |
| **Cirrhosis** | **yes** | **6.26±4.73** | **3.49±2.77** | **<0.0001** | **4.03±3.42** | **0.97±0.89** | **<0.0001** |
|  | **no** | **1.43±0.80** | **1.06±0.48** | **<0.0001** | **0.86±0.44** | **0.27±0.14** | **<0.0001** |
| **Viral loada** | **high** | **3.21±3.25** | **1.88±1.78** | **<0.0001** | **1.93±1.67** | **0.46±0.38** | **<0.0001** |
|  | **low** | **4.30±5.22** | **2.66±2.92** | **0.017** | **2.93±4.25** | **0.82±1.07** | **0.011** |
| **Treatment experiencedb** | **yes** | **6.50±6.75** | **3.70±3.50** | **0.067** | **3.94±4.06** | **0.84±0.69** | **0.049** |
|  | **no** | **3.15±3.32** | **1.91±1.93** | **<0.0001** | **2.02±2.50** | **0.54±0.69** | **<0.0001** |
| **HBVcoinfection** | **yes** | **1.00±0.21** | **1.10±0.81** | **0.851** | **0.94±0.31** | **0.30±0.16** | **0.014** |
|  | **no** | **3.72±4.05** | **2.20±2.27** | **<0.0001** | **2.34±2.84** | **0.60±0.71** | **<0.0001** |
| **ALT level** | **elevated** | **3.27±3.44** | **2.02±2.10** | **<0.0001** | **2.36±2.88** | **0.57±0.70** | **<0.0001** |
|  | **normal** | **5.33±6.43** | **2.83±2.89** | **0.082** | **1.55±1.92** | **0.60±0.65** | **0.058** |
| **Genotype** | **3** | **4.27±4.66** | **2.51±2.70** | **<0.0001** | **2.90±3.35** | **0.73±0.86** | **<0.0001** |
|  | **6** | **2.59±2.58** | **1.61±1.16** | **0.007** | **1.37±1.30** | **0.37±2.44** | **<0.0001** |
| **Treatment regimens** | **SOF±RBV** | **2.54±2.72** | **1.38±1.08** | **0.011** | **1.40±1.24** | **0.33±0.21** | **<0.0001** |
|  | **SOF+DCV±RBV** | **3.00±2.62** | **1.77±1.71** | **0.008** | **1.90±1.65** | **0.44±0.35** | **0.001** |
|  | **SOF/VEL±**  **RBV** | **4.60±5.07** | **2.87±2.82** | **0.002** | **3.06±3.73** | **0.83±0.94** | **<0.0001** |
| **RBV**  **addition** | **with** | **3.70±4.38** | **2.23±2.51** | **<0.0001** | **2.40±3.15** | **0.58±0.74** | **<0.0001** |
|  | **without** | **3.20±2.82** | **1.88±1.24** | **0.011** | **1.88±1.48** | **0.56±0.55** | **<0.0001** |
| **SVR12** | **yes** | **3.61±4.06** | **2.16±2.27** | **<0.0001** | **2.30±2.84** | **0.59±0.71** | **<0.0001** |
|  | **no** | **2.76±2.41** | **1.57±1.12** | **0.180** | **1.62±1.23** | **0.39±0.32** | **0.079** |

**Abbreviations:** ALT, alanine aminotransaminase; APRI, aspartate aminotransferase to platelet ratio index; DCV, daclatasvir; FIB-4, fibrosis-4; HBV, hepatitis B virus; RBV, ribavirin; SOF, sofosbuvir; SVR12: sustained virological response at posttreatment week 12; VEL: velpatasvir.

a: High level of viral load (HCV-RNA>800000 IU/mL) and low level of viral load (HCV-RNA≤800000 IU/mL).

b: Treated with DAAs or interferon and ribavirin regimens.

**Supplementary Fig. 1** **SVR12 rates in patients infected with genotypes 3 and 6 in diverse regimens.**

**Supplementary Fig. 1** Overall, the difference in SVR12 rate between six treatment regimens: P>0.05. For patients infected with genotype 3, the difference in SVR12 rate between six treatment regimens: P>0.05. For patients infected with genotype 6, the difference in SVR12 rate between six treatment regimens: P>0.05.

**Supplementary Fig. 2 SVR12 rates in patients treated with diverse genotypes.**


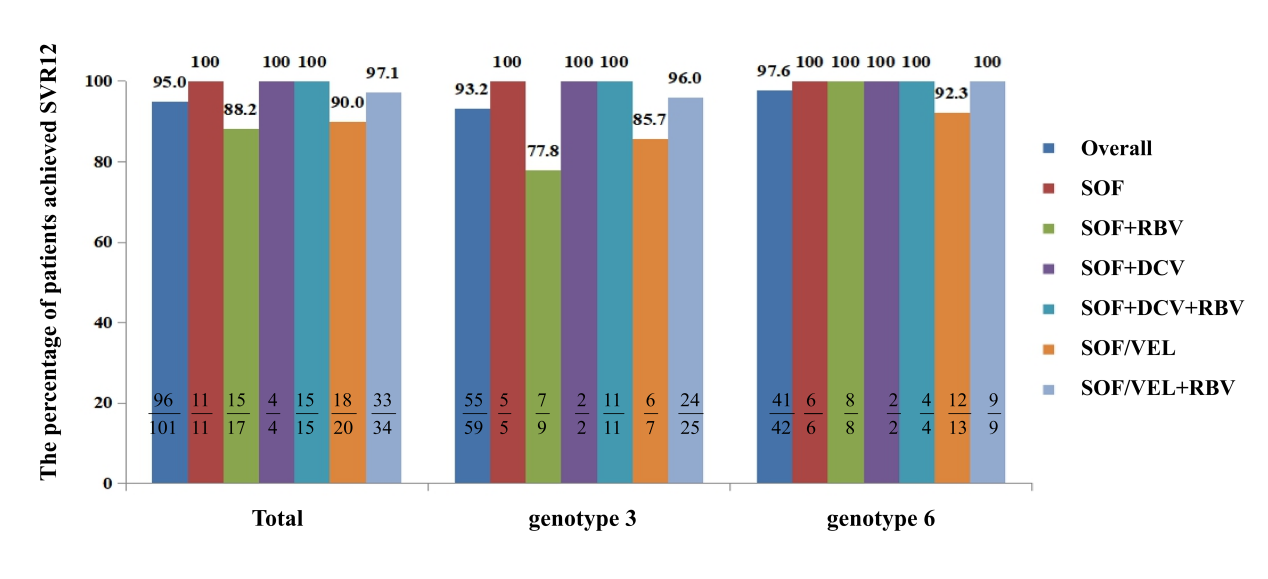


**Supplementary Fig. 2** We compared the SVR12 rate in diverse genotypes. The data showed no significant difference between groups with genotypes 3 and 6, genotypes 3b and non3b: P>0.05. *non3b including 3a, 3k, and 3e/3a.
